# Supplementary material
Source: Springer Nature journal article supplement (https://www.springermedizin.de/resource/supplementary/13049_2010_184_MOESM1_ESM.pdf/9666054)
Supplement: MOESM1 [file 9666054]

Number of healthcare professionals  
at the two hospitals  
3144 persons

Absent 292 persons

Did not want to participate  
450 persons

2402 persons answered the questionnaire.  
Percentage of answers 84 % of practically  
possible, 76 % of theoretically possible.
